# Supplementary material for: Institutions Beyond Quality: How Legislation and Execution Shape the Global Energy Transition
Source: Research Square preprint supplement (doi:10.21203/rs.3.rs-7561360/v1), 2025-09-12
Supplement: Supplementary file 1 [file 4fbec9b0836e6825967d25c7.docx]

**Appendix A:**

Energy legislation serves as an essential tool for promoting the renewable energy transition in different countries. Evaluating the effectiveness of laws and policies is a long-standing research topic that requires a well-designed methodology for both data collection and analysis. Existing studies have already used the number of legal documents adopted as an indicator of government activity in promoting the energy transition. One of the well-known and widely cited sources of knowledge on climate regulations is the Climate Change Laws website, which collects information on legal documents relevant to climate change issues. This database includes information on 196 UNFCCC member countries (as well as 3 non-member territories) and collects basic information on regulatory activity, including documents relating to one of the designated aspects, among which are climate change mitigation, adaptation, and disaster risk management. Documents in the database regulate national and sectoral levels. Importantly, energy legislation is included in the collection even if climate change is not explicitly mentioned in the text of the document. Moreover, the database includes documentation from UNFCCC portals that provide an overview of countries' national activities to address climate change.

Climate Change Laws provides a number of comparative classifications of documentation. First, the documents are divided according to the branch of government that adopted it, i.e., legislative or executive, and therefore all observations refer to either legislation or policy. Furthermore, the type of document, topic, sector and other characteristics are specified. The existing classifications are key information necessary for creating variables suitable for statistical analysis and econometric modelling.

To include information on a country's legislative activity in the fight against climate change within the energy sector in the research sample, all existing documents in the database should be analyzed to count the number of events, which in this case are the adoption of a legal document. The Climate Change Laws database was used as the basis for the analysis, which at the time of extraction from the official website included 7 310 observations, representing laws and policies. Calculations were performed using code developed in the R programming language.

First, all legislation and policies not related to the energy sector were excluded from the initial database. To do this, the *‘str_detect’* function was used for the ‘Sector’ variable, which identified all documents containing ‘Energy’, even if the legislation or policy did not regulate only the energy sector. At the same time, using the *‘filter’* function in the variable ‘Category’ only laws and policies (‘Legislative’, ‘Executive’) remained, excluding, for example, UNFCCC country reports. The new database now contains 2 299 observations, which only include energy-related legal documents. Duplicate documents representing the same laws, presented in different languages, were also deleted, leaving 2 045 laws and policies.

Secondly, the obtained database was grouped by country, year and adopted documents using the *‘group_by’* and *‘summarise’* functions. This produced a database containing the countries and years in which the laws and policies were adopted, as well as the number of documents of each type accepted in a given year. Next, using the *‘pivot_wider’* function, laws and policies became independent variables (‘Legislative’, ‘Executive’), the values of which are the number of documents adopted by country and year. Furthermore, the *‘mutate’* function created a variable ‘Total’, which represents the sum of laws and policies.

Thirdly, unified time intervals were set for the entire sample to obtain the final data sample, and cumulative values were calculated. Initially, a list of all countries was selected using the *‘unique’* function, and the required time interval from 1976 to 2024 was created. Then, using the *‘expand_grid’* function, a basis for the final version of the database was created, where each country is represented by a single time interval from 1976 to 2024, regardless of the actual laws' adoption timing. The year 1976 was chosen because the first laws for the energy sector were adopted at that time, according to the Climate Change Laws database. After that, the latest version of the sample with the number of laws and policies was added to the final database, and all empty values were replaced with zeros. Thus, if a country did not adopt a law, policy, or both in a given year, the corresponding cell will contain ‘0’. Then, using the *‘cumsum’* function, cumulative values were calculated for laws, policies and the total number of documents. Finally, the data was arranged by country and year using the ‘arrange’ function.

Thus, a sample was obtained containing 9 989 observations for 202 entities from 1976 to 2024 with six variables, namely “Legislative” (number of laws, i.e. documents adopted by the legislative branch in a certain country in a particular year) and “Executive” (number of policies, i.e. documents adopted by the executive branch in a certain country in a particular year), “Total” (the sum of the two previous variables, i.e. documents adopted by the legislative and executive branches in a certain country in a particular year), as well as three cumulative values of the variables described. For further analysis, observations containing the values ‘European Union’, ‘International’, ‘No Geography’ as the country were excluded from the list, leaving 199 territories in the sample with 9 751 observations.

This methodology provides an indication of countries' legislative activity, as well as information on the number of documents in force in a given year that regulate the energy sector within the framework of climate change mitigation, by calculating cumulative values. Furthermore, the database shows not only a quantitative assessment of all documents, but also an estimate of the number of laws and policies, i.e. the performance of various branches of government.

**Appendix B:**

Following the logic of Euler’s theorem and flexible production-function representations, we model renewable energy capacity as a function of institutional and economic drivers, approximated by a translog specification. In practice, this translates into a regression equation that includes: a) Lagged levels of institutional indices (legislation and execution), which capture long-run effects of accumulated policy stocks; b) Contemporaneous changes in these indices, which measure short-run effects of new policy actions; and c)Interaction terms between lagged levels and contemporaneous changes, which identify transitional effects—the frictions, adjustment costs, or amplification that occur as new policies interact with existing institutional frameworks.

Formally, our empirical specification can be written as:

where ​ denotes the change in renewable energy capacity (or share) for country i in year t, and the error term is clustered at the country level to account for serial correlation. We consider lag dependent variable ( to overcome any potential serial correlation bias. Coefficients reflects the **long-run contribution** of institutional stocks; captures **short-run contemporaneous responses**; and measures **transitional adjustments**, showing whether pre-existing institutional levels amplify or dampen the impact of new policy actions.

This specification is closely aligned with recent advances in heterogeneous panel-data econometrics, where multi-way fixed effects are used to control for high-dimensional unobserved heterogeneity (Wooldridge, 2010; Baltagi, 2021; Correia, Guimarães, & Zylkin, 2020). By focusing on long differences, we mitigate biases from short-term noise and serial correlation while preserving sufficient variation to estimate horizon-specific effects (Hahn, Hausman, & Kuersteiner, 2007).

If we translate into Cobb-Douglas (CD)

If you impose constant returns to scale (CRS), **Euler’s Theorem** gives:

Taking log-differences between

**Short-run effects** (impact of contemporaneous changes):

**Long-run effects** under CD with fixed elasticities are just the same elasticities ; in levels they show up as the cumulative response over longer horizons (e.g., long differences).

**Transitional effects** do **not** appear in pure CD because elasticities are constant (no interaction between baseline levels and changes).

Use a translog, which is a second-order approximation to a broad class of homothetic functions and nests CD:

+

(If you also impose CRS/homogeneity, the ’s and ’s satisfy linear “adding-up” constraints that are the translog counterpart to Euler’s theorem.)

Take a **one-period difference** (or an L-period long difference). Using the mean-value form, a practical regression representation is:

Where

**Short-run effects:** the **first term** . These are the immediate elasticities evaluated in the previous period.

**Transitional effects:** the **interaction term**

These capture how **baseline levels** (modulate the impact of current changes — i.e., adjustment costs, crowd-in/out, or policy-learning frictions. Negative in these interactions corresponds exactly to the “transitional slowdown”.

**Long-run effects:** in a translog, elasticities are **state-dependent.** The long-run (steady-state) elasticity of w.r.t. ​ is:

evaluated at long-run levels. Empirically, in long-difference regressions you proxy this with **lagged levels** (e.g., ​) whose coefficients map to the expression above. That is exactly why our long-run terms on regressor show up as significant in Tables 1–3.

Estimable “three-horizon” regression

- ​: **long-run** contributions of institutional/structural stocks.
- : **short-run** contemporaneous responses.
- ​: **transitional** adjustment (do level stocks amplify or dampen the effect of changes?).

This specification is the empirical analogue of the **translog-Euler decomposition** above, and it matches your Tables 1–3 interpretation (positive long-run legislative/execution stocks, selective short-run boosts, and often negative transitional terms indicating implementation frictions).

**Appendix C. R code**

# 1. Filter for Energy-related laws, exclude UNFCCC

energy_data <- csv_data %>%

filter(str_detect(Sector, "Energy"),

Category %in% c("Executive", "Legislative"))

# 2. Remove duplicates

energy_data1 <- energy_data %>%

rename(document_title = `Document Title`)

energy_data_clean <-energy_data1[!duplicated(energy_data1$document_title), ]

# 3. Group and summarize

grouped_data <- energy_data_clean %>%

group_by(Geographies, Year, Category) %>%

summarize(Count = n(), .groups = "drop")

# 4. Pivot wider

spread_data <- grouped_data %>%

pivot_wider(names_from = Category,

values_from = Count,

values_fill = 0)

# 5 . Calculate Total

final_data <- spread_data %>%

mutate(Total = Executive + Legislative)

# 6. Complete the grid

all_countries <- unique(csv_data$Geographies)

all_years <- 1976:2024

complete_grid <- expand_grid(Geographies = all_countries, Year = all_years)

# 7. Join with the complete grid

full_data <- complete_grid %>%

left_join(final_data, by = c("Geographies", "Year")) %>%

mutate(Executive = replace_na(Executive, 0),

Legislative = replace_na(Legislative, 0),

Total = replace_na(Total, 0))

# 8. Calculate cumulative sums

cumulative_data <- full_data %>%

group_by(Geographies) %>%

mutate(Cumulative_Executive = cumsum(Executive),

Cumulative_Legislative = cumsum(Legislative),

Cumulative_Total = cumsum(Total)) %>%

ungroup()

# 9. Arrange the data

arranged_data <- cumulative_data %>%

arrange(Geographies, Year)
